# Supplementary material for: Interface controlled solid-state lithium storage performance in free-standing bismuth nanosheets
Source: Royal Society of Chemistry journal article supplement (doi:10.1039/d0dt03613g), 2020-11-23
Supplement: d0dt03613g1.pdf [file d0dt03613g1.pdf]

## Supplementary Information

# Interface Controlled Solid-State Lithium Storage in Free-Standing Bismuth Nanosheets

Yayu Peng,<sup>a</sup> Liang Fang,<sup>a</sup> Yongtao Li,<sup>a,b</sup> Hai-Wen Li,<sup>\*b</sup> Torben R. Jensen<sup>\*c</sup> and Qingan Zhang<sup>\*a</sup>

<sup>a</sup>School of Materials Science and Engineering & Key Laboratory of Green Fabrication and Surface Technology of Advanced Metal Materials of Ministry of Education, Anhui University of Technology, Maanshan 243002, China. E-mail: qazhang\_ahut@163.com

<sup>b</sup>International Research Center for Hydrogen Energy and WPI International Institute for Carbon-Neutral Energy Research (WPI-I2CNER), Kyushu University, Fukuoka 819-0395, Japan. email: li.haiwen.305@m.kyushu-u.ac.jp

<sup>c</sup>Center for Materials Crystallography, Interdisciplinary Nanoscience Center and Department of Chemistry, Aarhus University, Langelandsgade 140, DK-8000 Aarhus C, Denmark.

**Table S1** Cyclability and rate capability comparison of bismuth anode materials in batteries with solid-state or liquid electrolytes and other reported representative works<sup>S1-S6</sup>.

| Anode material              | Rate Capability (mAh g <sup>-1</sup> )                                                                                                                                                                                                                     | Cycling Capacity (mAh g <sup>-1</sup> )               | Batteries                            | Ref.             |
|-----------------------------|------------------------------------------------------------------------------------------------------------------------------------------------------------------------------------------------------------------------------------------------------------|-------------------------------------------------------|--------------------------------------|------------------|
| Bismuth nanorod             | ~350.1 at 50 mA g <sup>-1</sup><br>~292.5 at 100 mA g <sup>-1</sup><br>~211.8 at 500 mA g <sup>-1</sup><br>~142.6 at 1000 mA g <sup>-1</sup><br>~102.3 at 2000 mA g <sup>-1</sup>                                                                          | ~302 after 150 cycles at 50 mA g <sup>-1</sup>        | Sodium-ion batteries (Liquid)        | [S1]             |
| Bismuth bulk                | ~394.8 at 50 mA g <sup>-1</sup><br>~385.1 at 100 mA g <sup>-1</sup><br>~382.9 at 400 mA g <sup>-1</sup><br>~371.9 at 800 mA g <sup>-1</sup><br>~369.8 at 1200 mA g <sup>-1</sup><br>~362.9 at 1600 mA g <sup>-1</sup><br>~356.0 at 2000 mA g <sup>-1</sup> | ~389 after 2000 cycles at 400 mA g <sup>-1</sup>      | Sodium-ion batteries (Liquid)        | [S2]             |
| Bismuth nanoparticles@C     | ~260 at 100 mA g <sup>-1</sup><br>~220.1 at 200 mA g <sup>-1</sup><br>~178.8 at 500 mA g <sup>-1</sup><br>~130.4 at 1000 mA g <sup>-1</sup><br>~83.4 at 2000 mA g <sup>-1</sup><br>~160 at 100 mA g <sup>-1</sup>                                          | ~123 after 100 cycles at 100 mA g <sup>-1</sup>       | Sodium-ion batteries (Liquid)        | [S3]             |
| Bismuth nanoparticles@C     | ~299 at 100 mA g <sup>-1</sup><br>~252 at 200 mA g <sup>-1</sup><br>~192 at 500 mA g <sup>-1</sup><br>~141 at 1000 mA g <sup>-1</sup><br>~90 at 2000 mA g <sup>-1</sup><br>~282 at 100 mA g <sup>-1</sup>                                                  | ~280 after 100 cycles at 100 mA g <sup>-1</sup>       | Lithium-ion batteries (Liquid)       | [S3]             |
| Bimuth@Graphite             | ~160 at 160 mA g <sup>-1</sup><br>~158 at 320 mA g <sup>-1</sup><br>~155 at 1600 mA g <sup>-1</sup><br>~156 at 1600 mA g <sup>-1</sup>                                                                                                                     | ~142 after 10000 cycles at 3200 mA g <sup>-1</sup>    | Sodium-ion batteries (Liquid)        | [S4]             |
| Bismuth nanoparticles       | ~350 at 17.5 mA g <sup>-1</sup><br>~342 at 70 mA g <sup>-1</sup><br>~329 at 175 mA g <sup>-1</sup><br>~319 at 350 mA g <sup>-1</sup><br>~313 at 700 mA g <sup>-1</sup><br>~216 at 1750 mA g <sup>-1</sup>                                                  | ~303 after 200 cycles at 700 mA g <sup>-1</sup>       | Magnesium-ion batteries (Liquid)     | [S5]             |
| BiPO <sub>4</sub> @Graphite | /                                                                                                                                                                                                                                                          | ~304 after 100 cycles at 50 mA g <sup>-1</sup>        | Lithium-ion batteries (Solid)        | [S6]             |
| <b>Bismuth nanosheets</b>   | <b>~411 at 250 mA g<sup>-1</sup></b><br><b>~364 at 500 mA g<sup>-1</sup></b><br><b>~321 at 1000 mA g<sup>-1</sup></b><br><b>~278 at 2000 mA g<sup>-1</sup></b><br><b>~239 at 4000 mA g<sup>-1</sup></b><br><b>~357 at 250 mA g<sup>-1</sup></b>            | <b>~287 after 100 cycles at 250 mA g<sup>-1</sup></b> | <b>Lithium-ion batteries (Solid)</b> | <b>This work</b> |

**Table S2** Temperature-dependent lithium ionic conductivity of selected liquid or solid state electrolytes including hydrides and oxides compared with LiPF<sub>6</sub> liquid electrolyte.

| Sample                                                                                                 | 30 °C<br>(S cm <sup>-1</sup> ) | 90 °C<br>(S cm <sup>-1</sup> ) | 120 °C<br>(S cm <sup>-1</sup> ) | Ref.  |
|--------------------------------------------------------------------------------------------------------|--------------------------------|--------------------------------|---------------------------------|-------|
| LiPF <sub>6</sub> liquid electrolyte                                                                   | 4.5×10 <sup>-3</sup>           | /                              | /                               | [S7]  |
| Li(CB <sub>9</sub> H <sub>10</sub> ) <sub>0.7</sub> (CB <sub>11</sub> H <sub>12</sub> ) <sub>0.3</sub> | 6.7×10 <sup>-3</sup>           | /                              | 8.5×10 <sup>-2</sup>            | [S8]  |
| Li <sub>4</sub> (BH <sub>4</sub> )(NH <sub>2</sub> ) <sub>3</sub>                                      | 3.1×10 <sup>-4</sup>           | 7.8×10 <sup>-4</sup>           | 1.1×10 <sup>-3</sup>            | [S9]  |
| Li <sub>7</sub> La <sub>3</sub> Zr <sub>2</sub> O <sub>12</sub>                                        | 1.6×10 <sup>-6</sup>           | 7.1×10 <sup>-4</sup>           | /                               | [S10] |
| Li <sub>3</sub> PO <sub>4</sub>                                                                        | 4.1×10 <sup>-8</sup>           | /                              | /                               | [S11] |
| <b>LiBH<sub>4</sub></b>                                                                                | <b>1.5×10<sup>-8</sup></b>     | <b>1.4×10<sup>-6</sup></b>     | <b>1.5×10<sup>-3</sup></b>      | [S12] |
| LiI                                                                                                    | 3.2×10 <sup>-8</sup>           | 5.2×10 <sup>-7</sup>           | 1.4×10 <sup>-6</sup>            | [S13] |
| LiNH <sub>2</sub>                                                                                      | /                              | 2.5×10 <sup>-7</sup>           | 2.5×10 <sup>-6</sup>            | [S13] |
| LiAlH <sub>4</sub>                                                                                     | 8.7×10 <sup>-9</sup>           | 3.6×10 <sup>-6</sup>           | 1.5×10 <sup>-5</sup>            | [S14] |
| LiBH <sub>4</sub> ·0.5NH <sub>3</sub>                                                                  | 1.0×10 <sup>-4</sup>           | 4.0×10 <sup>-2</sup>           | /                               | [S15] |

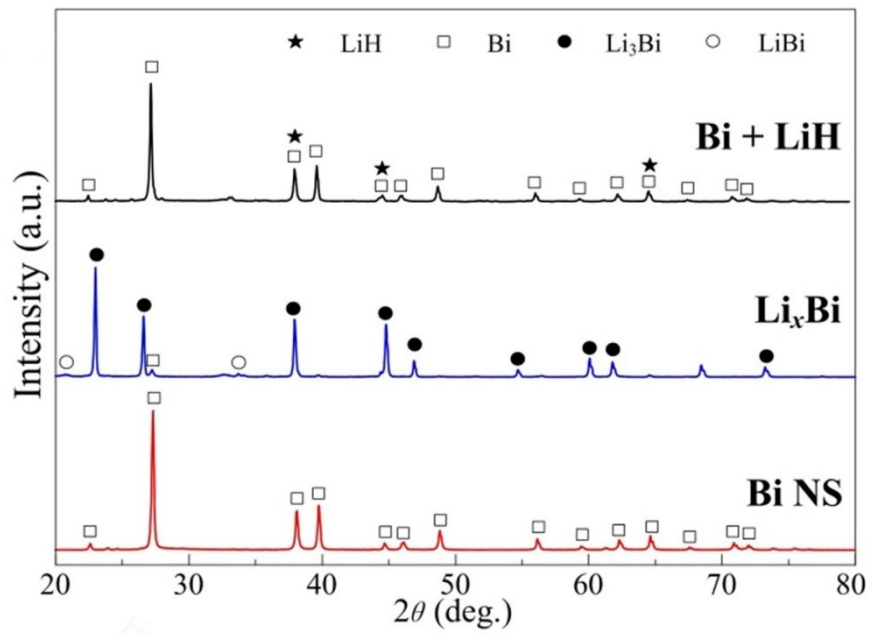

**Figure S1** XRD patterns for the Li-Bi system at different stages of the synthesis.

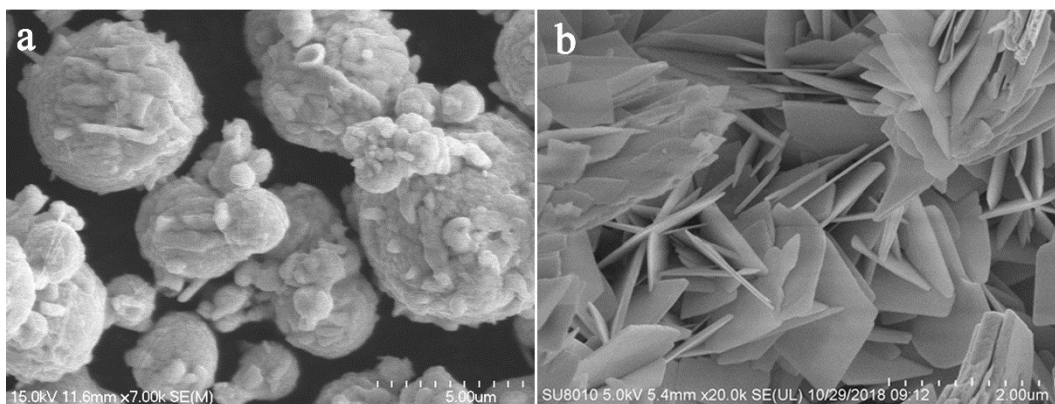

**Figure S2** SEM images of the a) Bulk-Bi micro-spheres and b) Bi-NSs nanosheets.

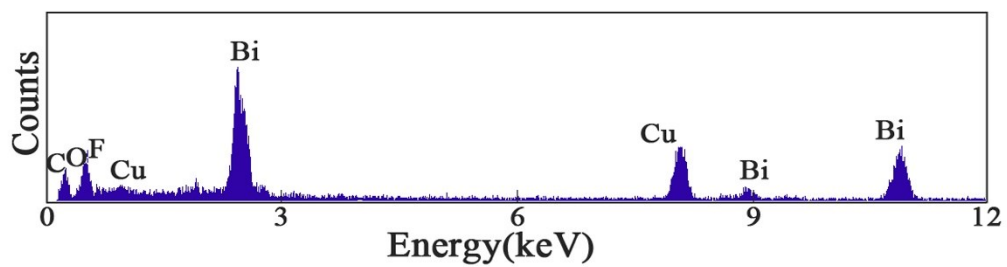

**Figure S3** Energy dispersive spectroscopy (EDS) of Bi-NSs electrode material after 100th lithiation /delithiation cycles at  $250 \text{ mA g}^{-1}$ .

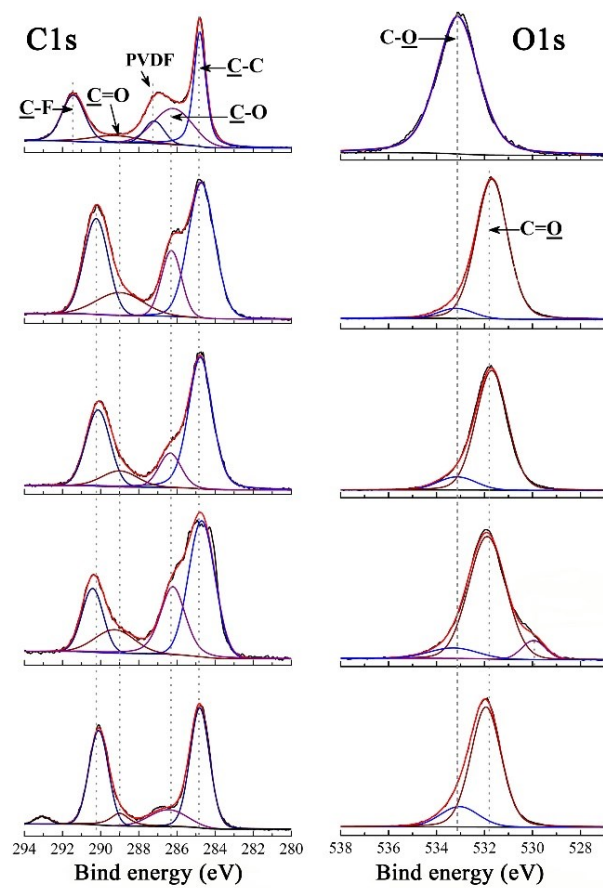

**Figure S4** C1s and O1s XPS spectra for the Bi-NSs samples upon lithiation/delithiation corresponding to Figure 2c.

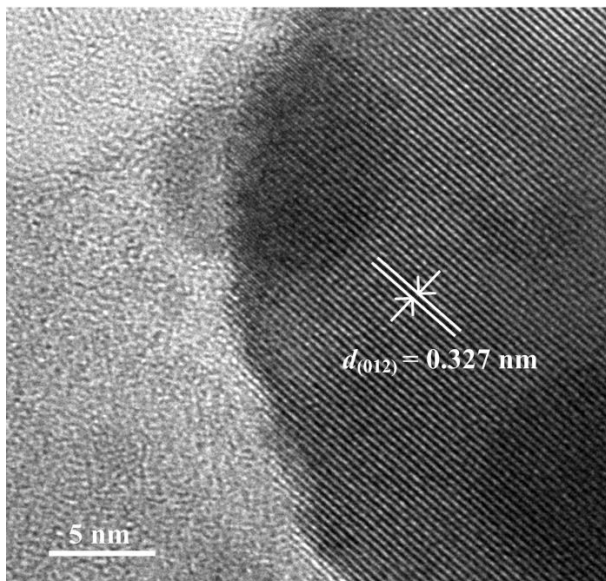

**Figure S5** HRTEM image for the cyclic Bi-NSs anode.

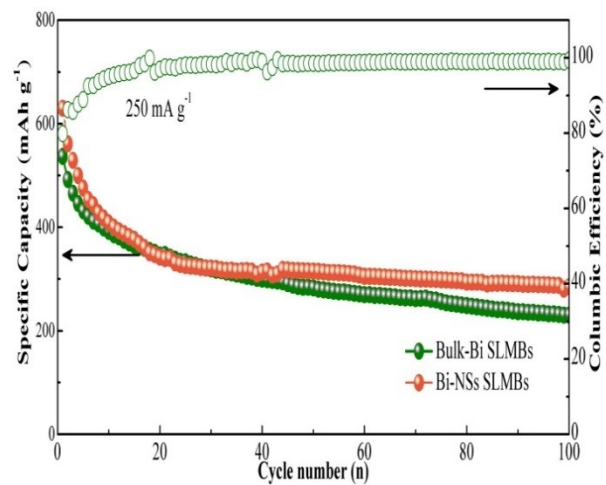

**Figure S6** Cycling performances of different Bi anodes in solid-state LIBs with half-cell structure.



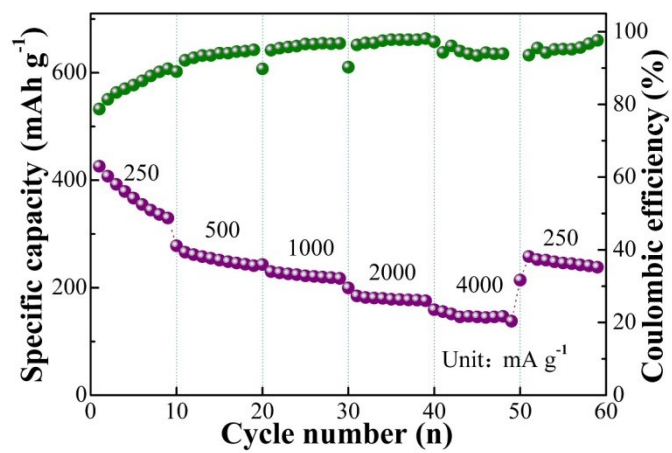

**Figure S7** Rate capabilities of Bulk-Bi half-cells at various current densities from 250 to 4000 mA g<sup>-1</sup>.

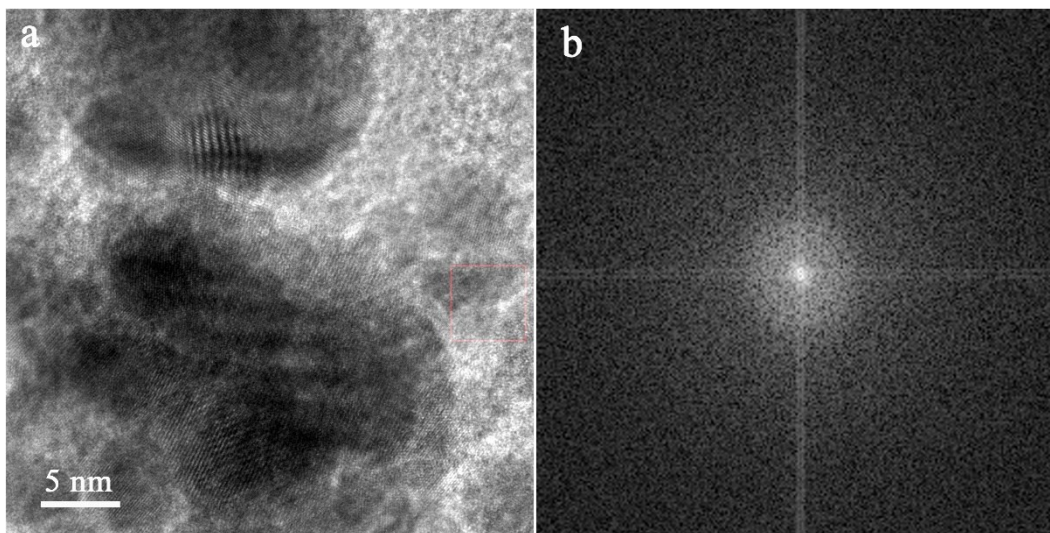

**Figure S8** a) HRTEM images for discharge state of Bi-NSs electrode; b) FFT digital diffractogram image of the  $\text{LiBH}_4$  inside the pink box in a).

## Supplementary References

1. S. Liu, J. Feng, X. Bian, J. Liu and H. Xu, *J. Mater. Chem. A*, 2016, **4**, 10098.
2. C. Wang, L. Wang, F. Li, F. Cheng and J. Chen, *Adv. Mater.*, 2017, **29**, 1702212.
3. F. Yang, F. Yu, Z. Zhang, K. Zhang, Y. Lai and J. Li, *Chem. Eur. J.*, 2016, **22**, 2333.
4. J. Chen, X. Fan, X. Ji, T. Gao, S. Hou, X. Zhou, L. Wang, F. Wang, C. Yang, L. Chen and C. Wang, *Energy Environ. Sci.*, 2018, **11**, 1218.
5. Y. Shao, M. Gu, X. Li, Z. Nie, P. Zuo, G. Li, T. Liu, J. Xiao, Y. Chen, C. Wang, J. Zhang and J. Zhang, *Nano Lett.*, 2013, **14**, 255.
6. C.F. Sun, J. Hu, P. Wang, X.Y. Cheng, S.B. Lee and Y. Wang, *Nano Lett.*, 2016, **16**, 5875.
7. Y. Yan, R.S. Kühnel, A. Remhof, L. Duchêne, E.C. Reyes, D. Rentsch, Z. Łodziana and C. Battaglia, *Adv. Energy Mater.*, 2017, **7**, 1700294.
8. S. Kim, H. Oguchi, N. Toyama, T. Sato, S. Takagi, T. Otomo, D. Arunkumar, N. Kuwata, S. Kawamura and S.I. Orimo, *Nat. Commun.*, 2019, **10**, 1081.
9. M. Matsuo, A. Remhof, P. Martelli, R. Caputo, M. Ernst, Y. Miura, T. Sato, H. Oguchi, H. Maekawa, H. Takamura and A. Borgschulte, *J. Am. Chem. Soc.*, 2009, **131**, 16389.
10. H. Xie, J.A. Alonso, Y. Li, M.T. Fernández-Díaz and J.B. Goodenough, *Chem. Mater.*, 2011, **23**, 3587.
11. N.I. Ayu, E. Kartini, L.D. Prayogi and M. Faisal, *Ionics*, 2016, **22**, 1051.
12. A. Unemoto, G. Nogami, M. Tazawa, M. Taniguchi and S.I. Orimo, *Mater. Trans.*, 2017, **58**, 1063.
13. M. Matsuo, T. Sato, Y. Miura, H. Oguchi, Y. Zhou, H. Maekawa, H. Takamura and S.I. Orimo, *Chem. Mater.*, 2010, **22**, 2702.

14. H. Oguchi, M. Matsuo, T. Sato, H. Takamura, H. Maekawa, H. Kuwano and S. Orimo, *J. Appl. Phys.*, 2010, **107**, 096104.
15. Y. Yan, J. Grinderslev, Y. Lee, M. Jørgensen, Y. Cho, R. Černý and T.R. Jensen, *Chem. Commun.*, 2020, **56**, 3971.
